# Supplementary material for: Hip fracture risk in relation to vitamin D supplementation and serum 25-hydroxyvitamin D levels: a systematic review and meta-analysis of randomised controlled trials and observational studies
Source: Springer Nature journal article supplement (doi:10.1186/1471-2458-10-331), 2010-06-11
Supplement: 12889_2010_2242_MOESM2_ESM.pdf [file 12889_2010_2242_MOESM2_ESM.pdf]

| Study                                               | Vitamin D Fractures/Subjects | Control Fractures/Subjects | Dose (IU)* | HR/RR (95% CI)          |
|-----------------------------------------------------|------------------------------|----------------------------|------------|-------------------------|
| Lips 1996 [29]                                      | 58/1291                      | 48/1287                    | 400        | 1.18 (0.81–1.71)        |
| Meyer 2002 [30]                                     | 50/596                       | 47/575                     | 400        | 1.09 (0.73–1.63)        |
| Trivedi 2003 [31]                                   | 21/1345                      | 24/1341                    | 820        | 0.85 (0.47–1.53)        |
| Grant 2005 [21]<br>Vitamin D vs Placebo             | 47/1343                      | 41/1332                    | 800        | 1.14 (0.75–1.72)        |
| Grant 2005 [21]<br>Vitamin D and Calcium vs Calcium | 46/1306                      | 49/1311                    | 800        | 0.94 (0.63–1.40)        |
| Law 2006 [32]                                       | 24/1762                      | 20/1955                    | 1100       | 1.36 (0.80–2.34)        |
| Lyons 2007 [22]                                     | 112/1725                     | 104/1715                   | 820        | 1.07 (0.83–1.39)        |
| Smith 2007 [33]                                     | 66/4727                      | 44/4713                    | 820        | 1.49 (1.02–2.18)        |
| <b>Total</b>                                        | <b>424/14095</b>             | <b>377/14229</b>           |            | <b>1.13 (0.98–1.29)</b> |

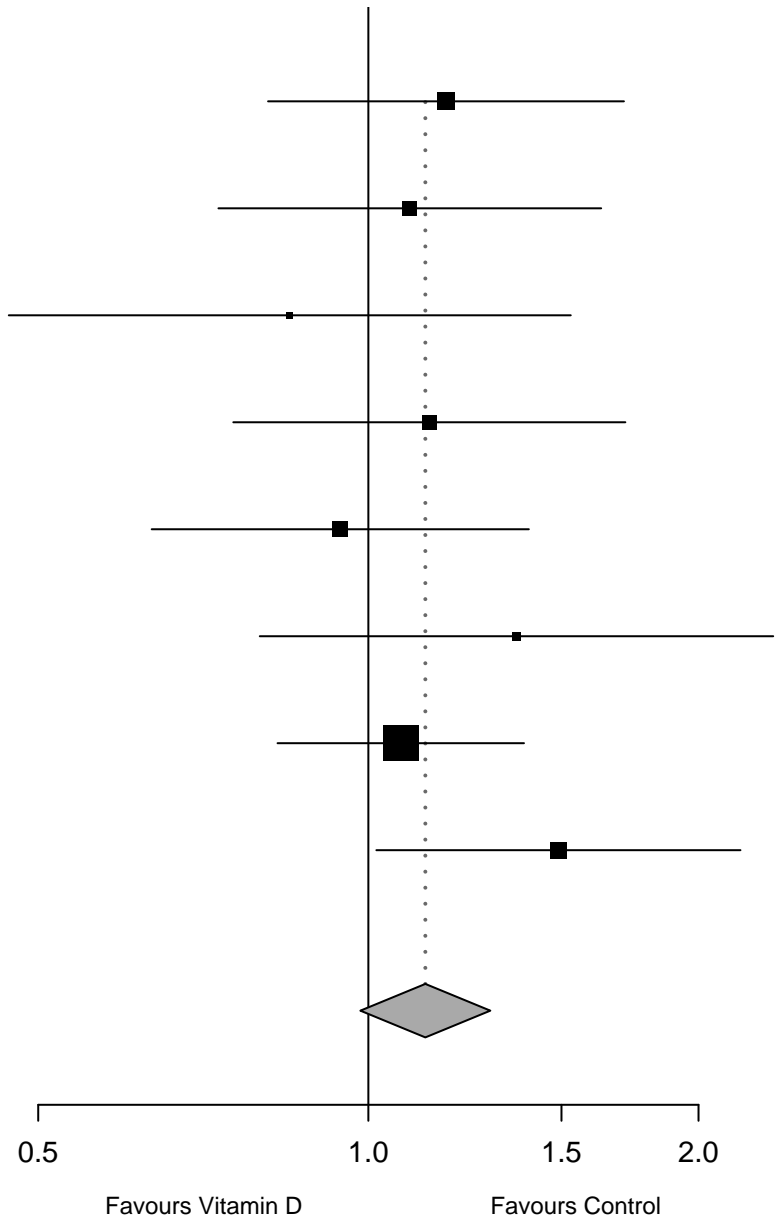

\*Equivalent daily dose of vitamin D in international units  
 $\chi^2=4.44$   $df=7$   $p=0.73$  for heterogeneity
