# Supplementary figures and images for: Hip fracture risk in relation to vitamin D supplementation and serum 25-hydroxyvitamin D levels: a systematic review and meta-analysis of randomised controlled trials and observational studies
Source: Springer Nature journal article supplement (doi:10.1186/1471-2458-10-331), 2010-06-11

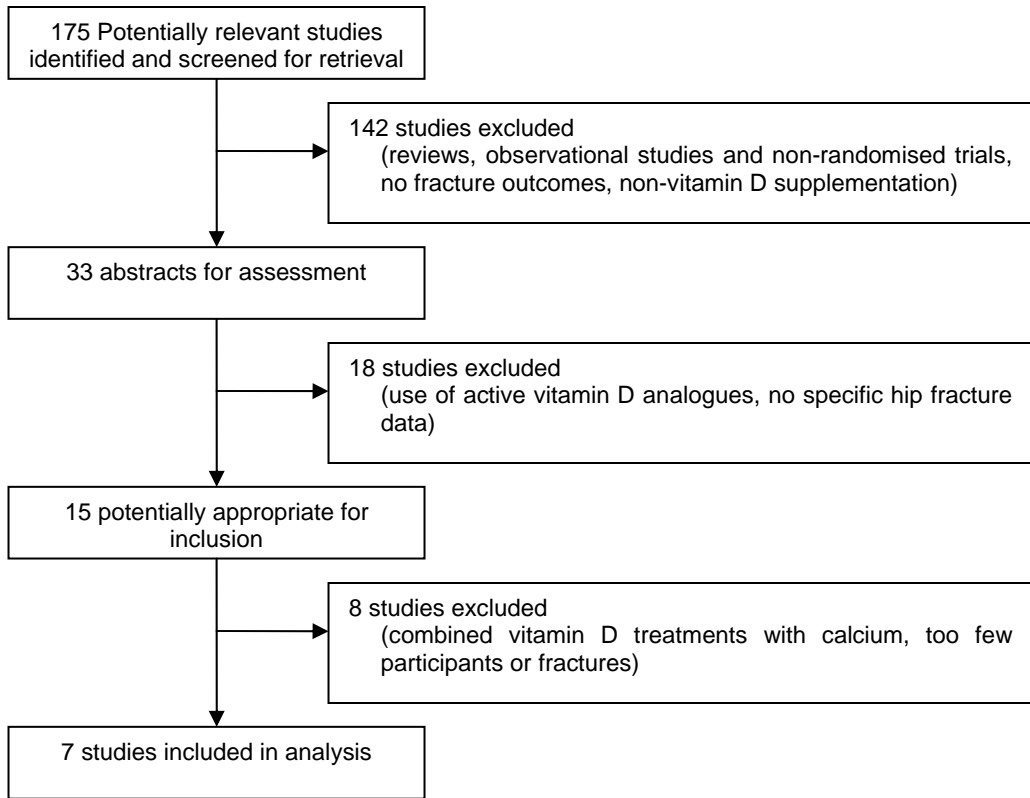

Supplement: 12889_2010_2242_MOESM1_ESM.pdf [file 12889_2010_2242_MOESM1_ESM.pdf]
